# Supplementary material for: Hole-transporting interlayers based on pyrazine-containing conjugated polymers for perovskite solar cells
Source: Royal Society of Chemistry journal article supplement (doi:10.1039/d3cp04533a), 2023-01-01
Supplement: d3cp04533a1.pdf [file d3cp04533a1.pdf]

## Supporting Information

### **Hole-transporting interlayers based on pyrazine-containing conjugated polymers for perovskite solar cells.**

D. S. Zamoretskov, I. E. Kuznetsov, A. N. Zhivchikova, M. M. Tepliakova, D. K. Sagdullina, M. V. Gapanovich, V. G. Kurbatov, A. G. Nasibulin, A. V. Akkuratov

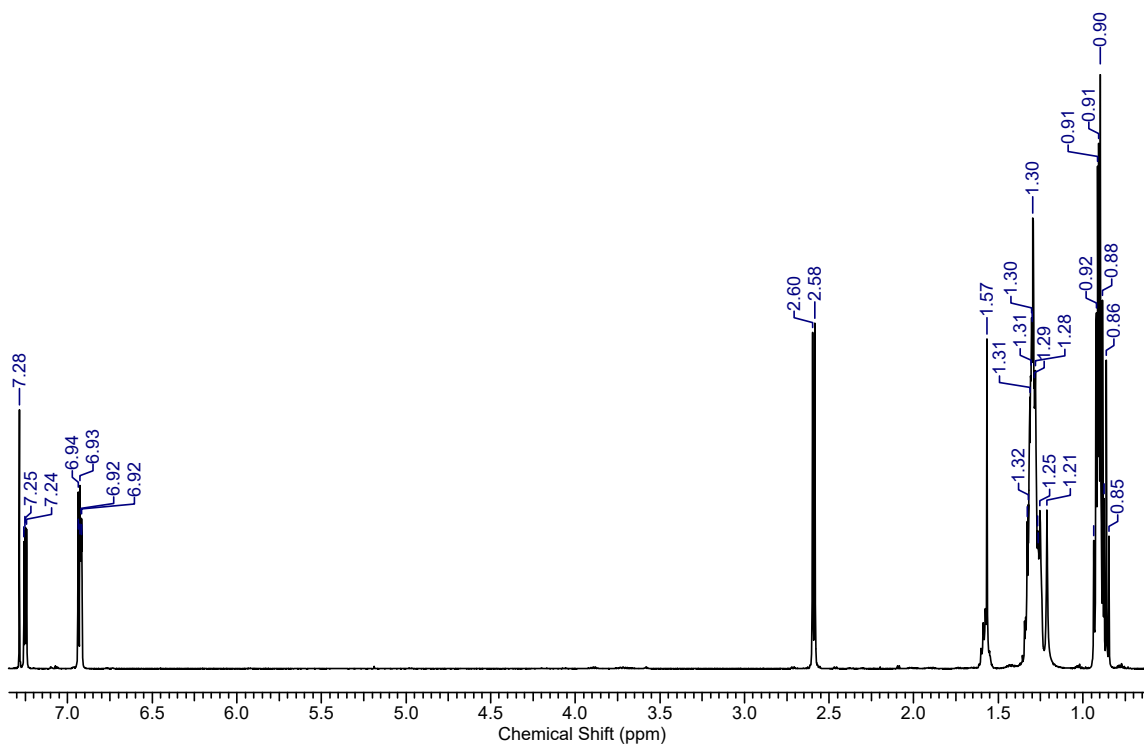

Figure S1.  $^1\text{H}$  NMR spectrum of compound 2.

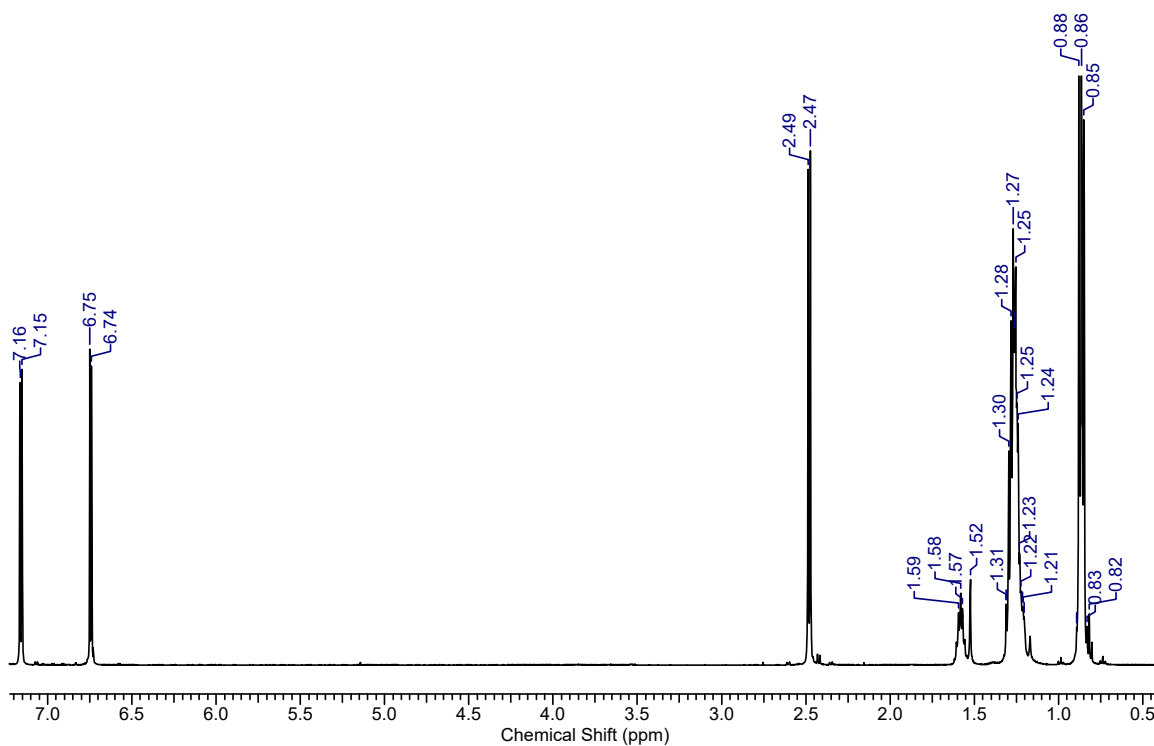

Figure S2.  $^1\text{H}$  NMR spectrum of compound 3.

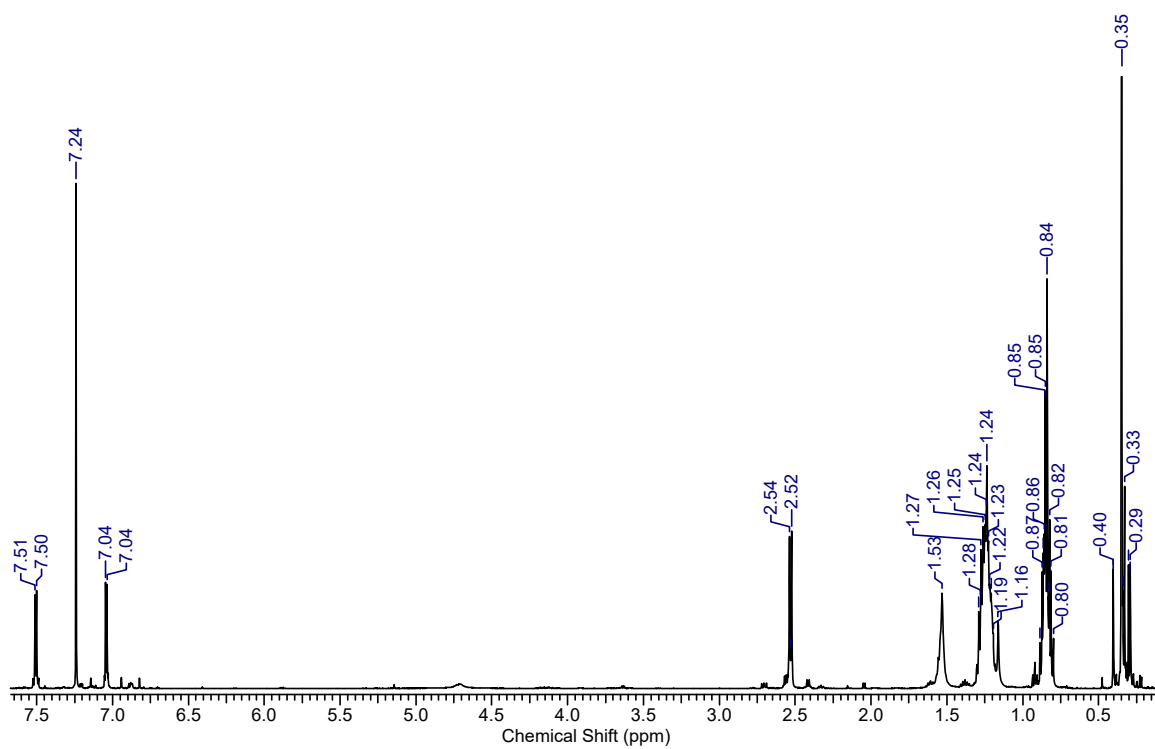

**Figure S3.**  $^1\text{H}$  NMR spectrum of compound 4.

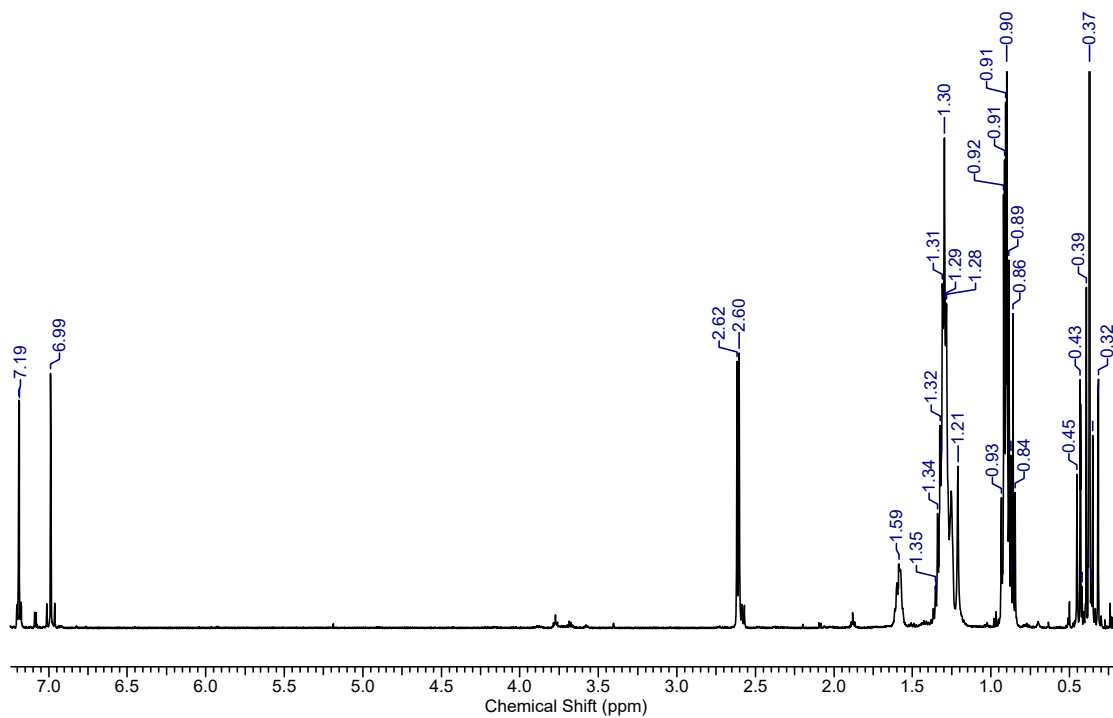

**Figure S4.**  $^1\text{H}$  NMR spectrum of compound 5.

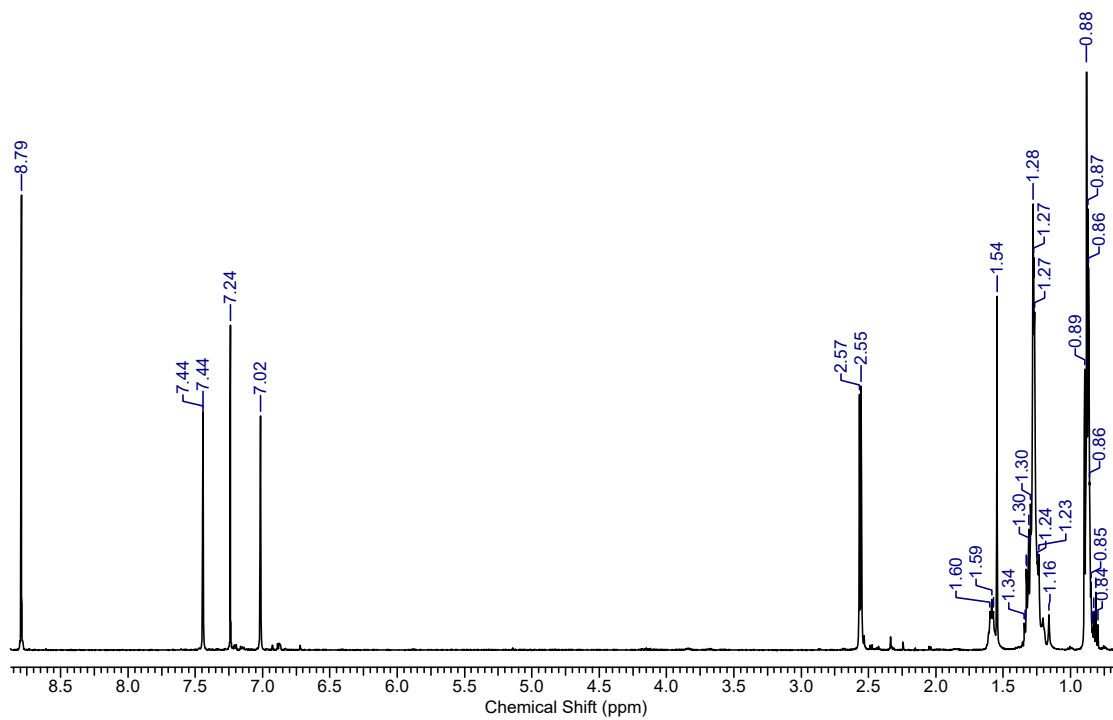

**Figure S5.**  $^1\text{H}$  NMR spectrum of compound 6.

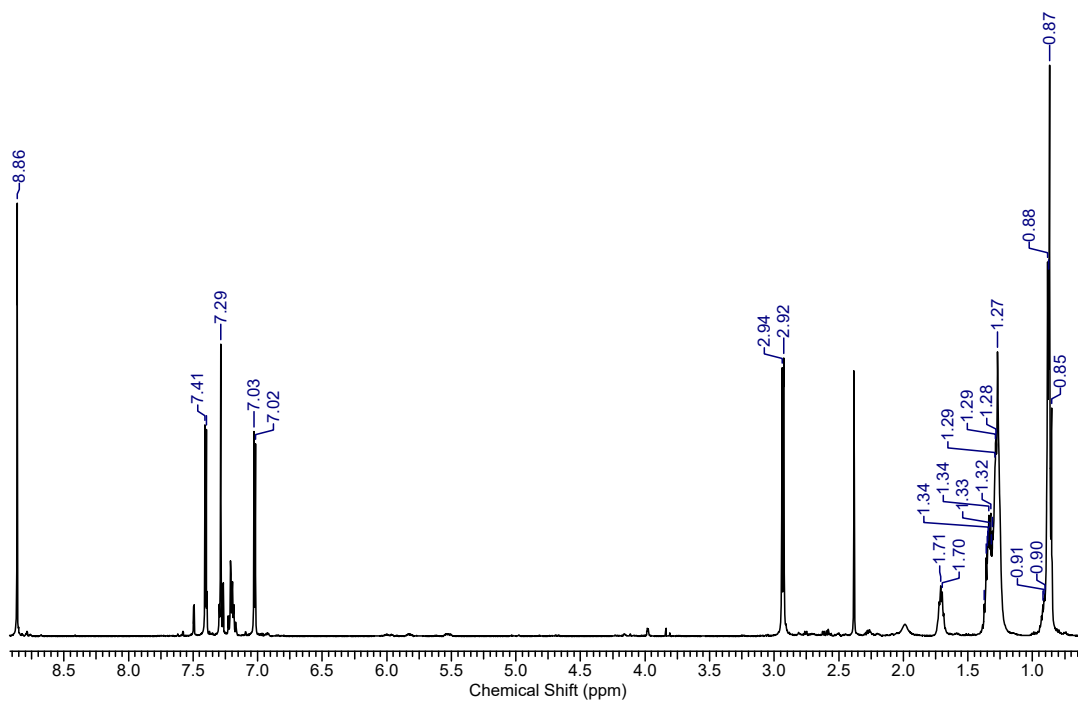

**Figure S6.**  $^1\text{H}$  NMR spectrum of compound 7.

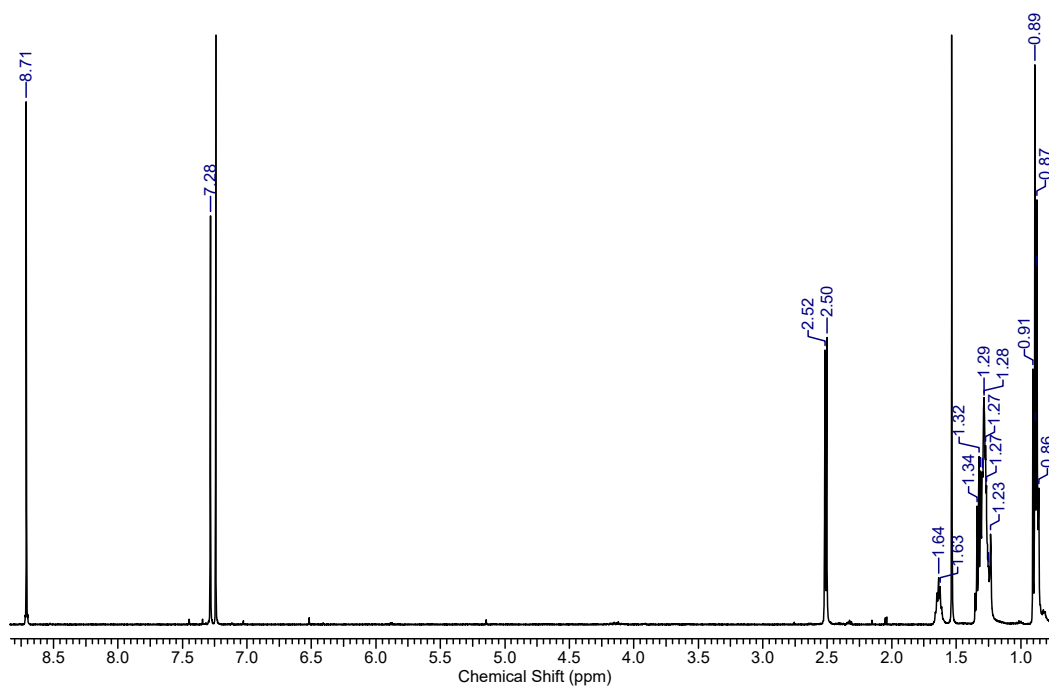

**Figure S7.**  $^1\text{H}$  NMR spectrum of monomer DThPyT-ex.

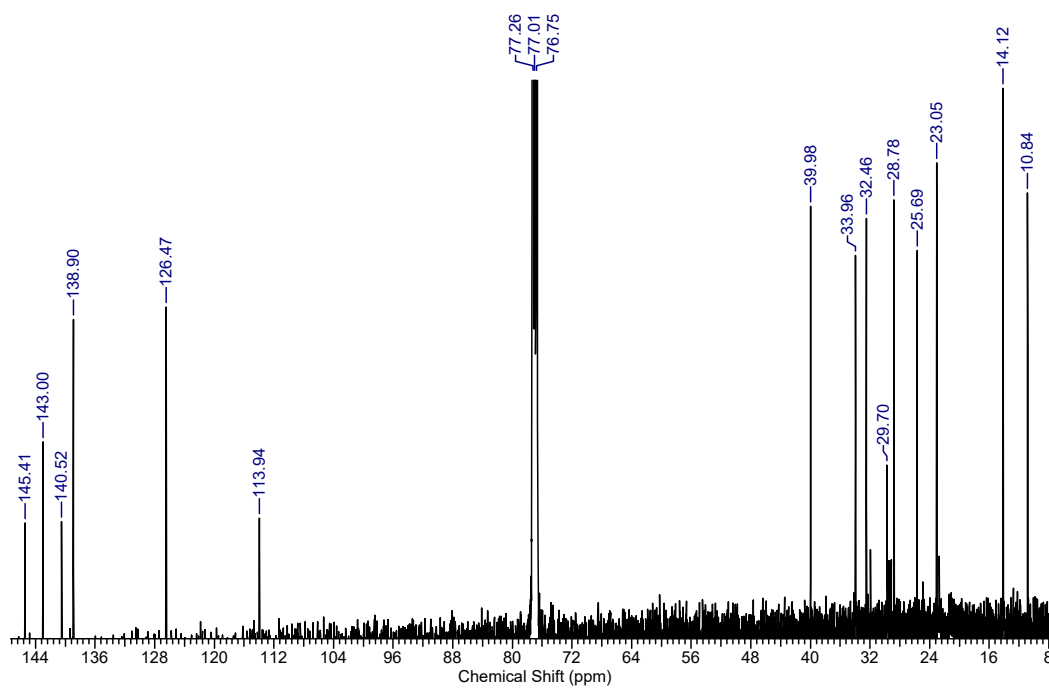

**Figure S8.**  $^{13}\text{C}$  NMR spectrum of monomer DThPyT-ex.

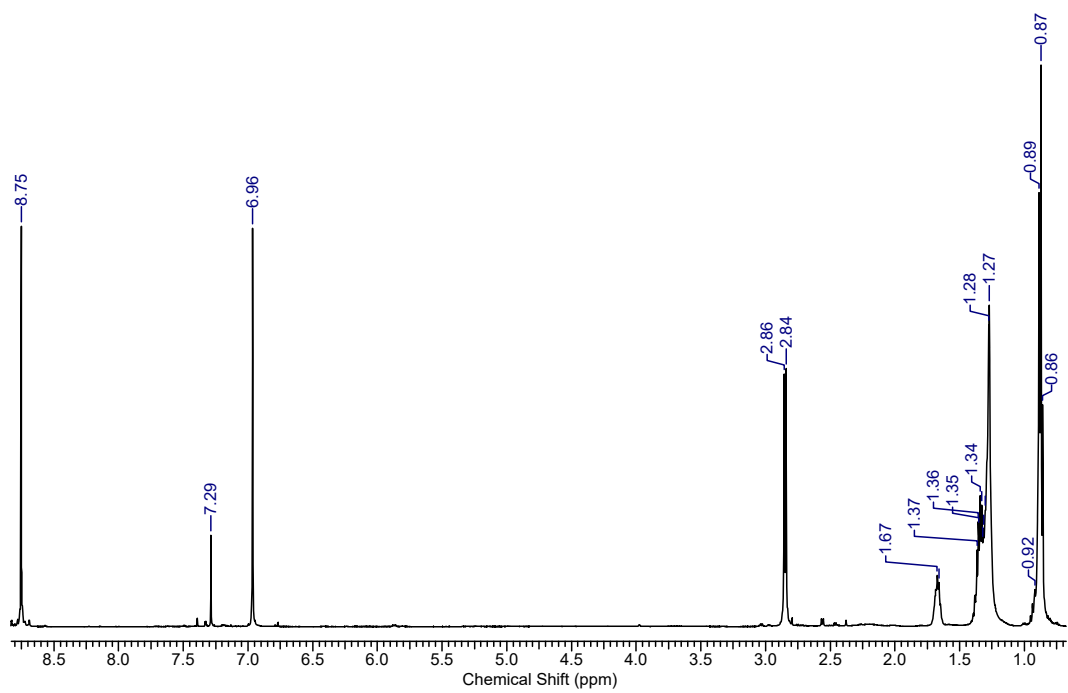

**Figure S9.**  $^1\text{H}$  NMR spectrum of monomer **DThPyT-in**.

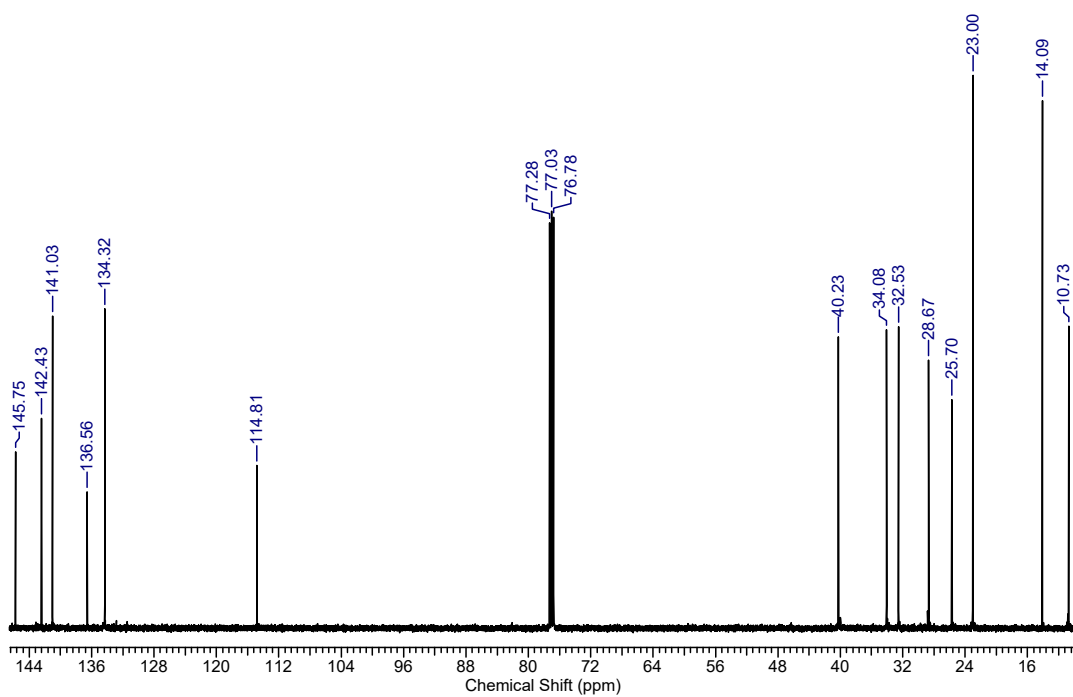

**Figure S10.**  $^{13}\text{C}$  NMR spectrum of monomer **DThPyT-in**.

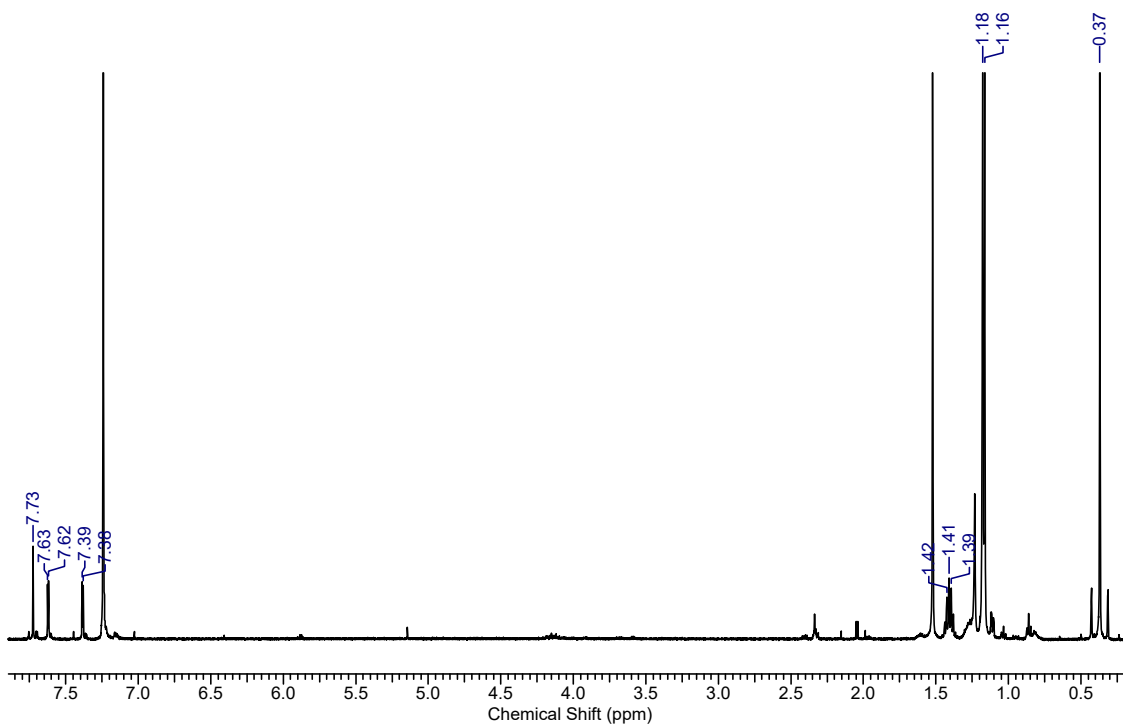

Figure S11.  $^1\text{H}$  NMR spectrum of monomer **BDT**.

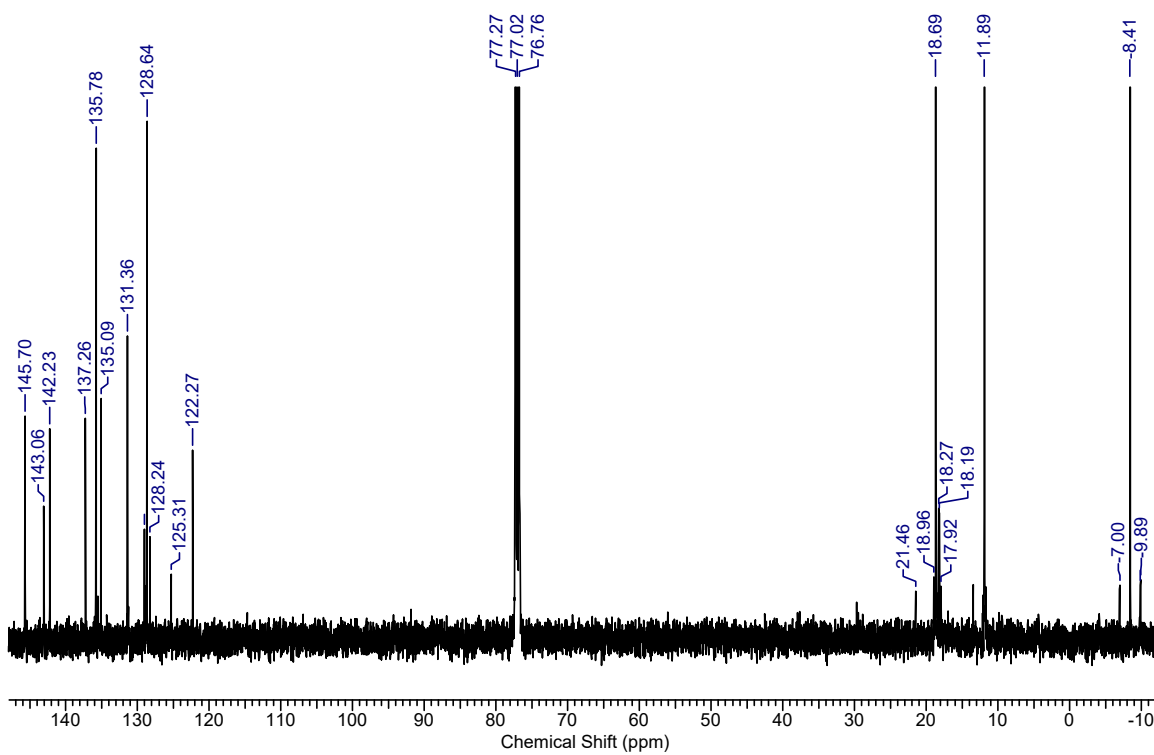

Figure S12.  $^{13}\text{C}$  NMR spectrum of monomer **BDT**.

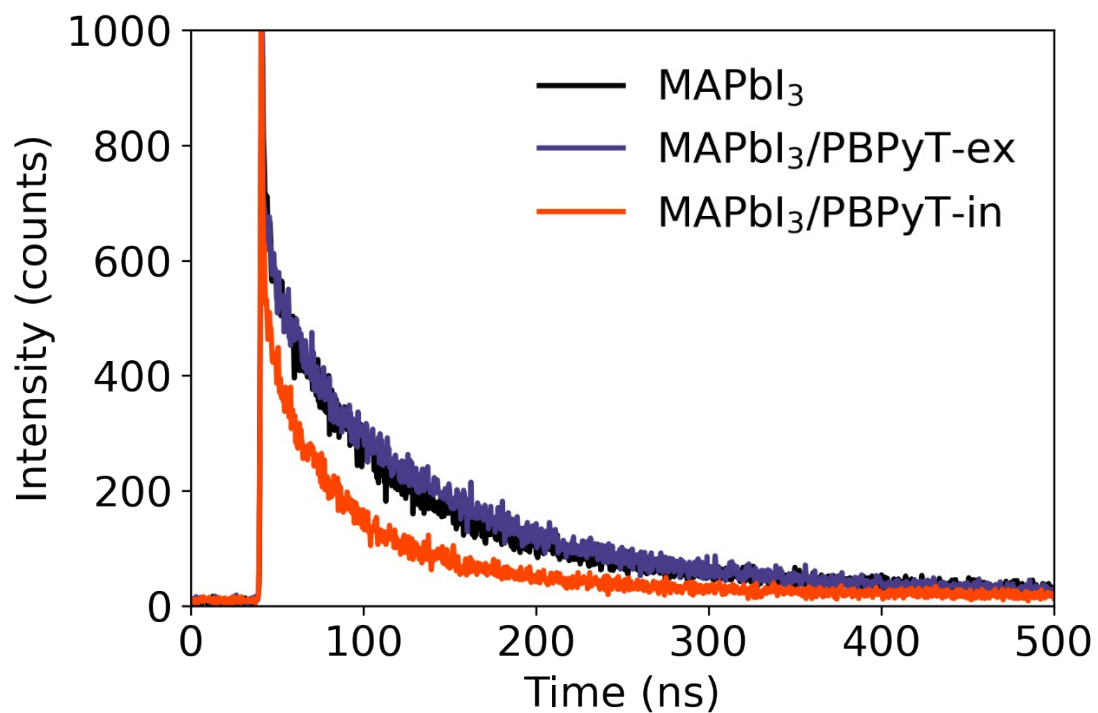

**Figure S13.** TRPL spectra of MAPbI<sub>3</sub>, MAPbI<sub>3</sub>/PBPyT-ex and MAPbI<sub>3</sub>/PBPyT-in

**Table S1.** TRPL parameters extracted from decay curves.

|                    | <b>A<sub>1</sub></b> | <b>τ<sub>1</sub></b> | <b>A<sub>2</sub></b> | <b>τ<sub>2</sub></b> | <b>c</b> | <b>τ<sub>avg</sub></b> |
|--------------------|----------------------|----------------------|----------------------|----------------------|----------|------------------------|
| PBPyT-ex           | 36.7                 | 5.3                  | 366.5                | 105.1                | 14.3     | 104.6                  |
| PBPyT-in           | 15.6                 | 1.8                  | 282.5                | 56.2                 | 14.5     | 56.1                   |
| MAPbI <sub>3</sub> | 212.4                | 7.0                  | 332.9                | 96.7                 | 16.0     | 92.7                   |



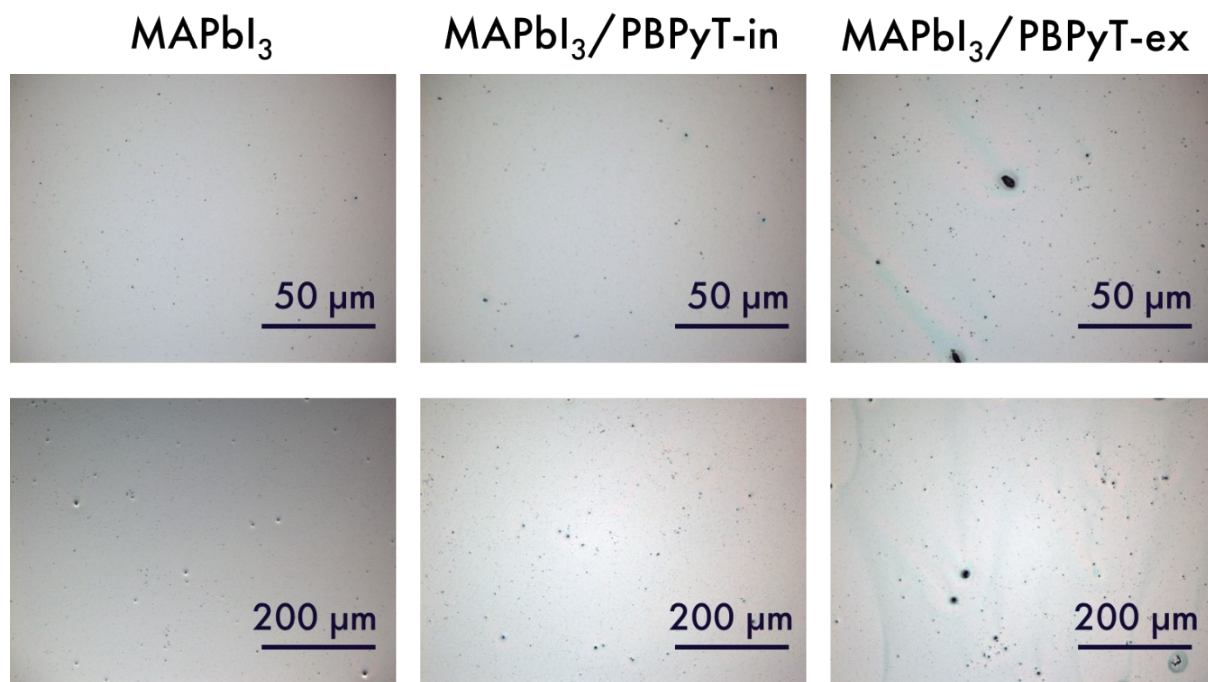

**Figure S14.** Optical microscopy images of glass substrates covered with MAPbI<sub>3</sub>, MAPbI<sub>3</sub>/PBPyT-in, and MAPbI<sub>3</sub>/PBPyT-ex.
